# Supplementary material
Source: Research Square preprint supplement (doi:10.21203/rs.3.rs-10307762/v1)
Supplement: Supplementary file 1 [file c184449779cf4681229ebd58.docx]

Supplementary Material for Greenhalgh et al ‘The mask efficacy controversy reconsidered …’

[Tables of Included Studies (n = 37) 2](#_Toc234433420)

[Table S1. Household transmission studies (Group 1; n = 9) 2](#_Toc234433421)

[Table S2. Community randomised controlled trials (Group 2; n = 7) 4](#_Toc234433422)

[Table S3. Outbreak investigations (Group 3; n = 9) 6](#_Toc234433423)

[Table S4. Case-control studies (Group 4; n = 6) 8](#_Toc234433424)

[Table S5. Prospective cohort studies (Group 5; n = 2) 9](#_Toc234433425)

[Empty table: Cross-sectional and seroprevalence studies (Group 6; n = 0) 10](#_Toc234433426)

[Table S6. Hajj pilgrimage studies (Group 7; n = 4) 10](#_Toc234433427)

[Rejected Studies (Table S7; n=29) 11](#_Toc234433428)

# Tables of Included Studies (n = 37)

Tables S1–S6 cover cognate Groups 1–7. Each table divides studies into those above the line (contributing credible evidence toward causal inference on mask efficacy) and those below the line (null result mechanistically expected, or structural limits prevent testing the primary question). Rejected studies are consolidated in Table S7. A more detailed version of these tables — including full quantitative bias analysis narratives and mechanism activation assessments — is available from the authors on request.

Abbreviations

*HH = household. SAR = secondary attack rate. RCT = randomised controlled trial. ITT = intention to treat. OR = odds ratio. aOR = adjusted odds ratio. PR = prevalence ratio. HR = hazard ratio. RR = relative risk / rate ratio. ARD = absolute risk difference. CI = 95% confidence interval. NS = not statistically significant. ILI = influenza-like illness. URI = upper respiratory infection. ARI = acute respiratory infection. URTI = upper respiratory tract infection. RTI = respiratory tract infection. PCR = polymerase chain reaction. TN = toward null. AN = away from null. FM = face mask. HH (intervention) = hand hygiene. NPI = non-pharmaceutical intervention. TND = test-negative design. DAG = directed acyclic graph. QBA = quantitative bias analysis. ICC = intracluster correlation coefficient. pp = percentage points. LFT = lateral flow test. EHR = electronic health record. SES = socioeconomic status.*

### Table S1. Household transmission studies (Group 1; n = 9)

*Above the line = contributes to causal inference on mask efficacy. Below the line = null result mechanistically expected; does not disconfirm mask efficacy. Cautionary tale = structural bypass of dominant exposure window. Rejected studies in Table S7.*

| **Study** | **Design & N** | **Pathogen / context** | **Key finding** | **Verdict** |
| --- | --- | --- | --- | --- |
| **ABOVE THE LINE — Contribute to causal inference on mask efficacy** | | | | |
| Suess 2012 Berlin, Germany | 3-arm cluster RCT 84 HH / 218 contacts Serial qRT-PCR | Influenza A(H1N1)pdm09 & B | ITT null (OR 0.39, 0.13–1.17). Early implementation <36h: OR 0.16 (0.03–0.92). Per-protocol: OR 0.30 (0.10–0.94). | ABOVE — Conditional. Three convergent mechanistic signals (timing, per-protocol, subtype). Strongest household influenza RCT. Weight: Moderate. |
| Cowling 2009 Hong Kong | 3-arm cluster RCT 259 HH / 794 contacts RT-PCR | Influenza A & B | ITT null. Pre-specified ≤36h subgroup: aOR 0.33 (0.13–0.87). Time-varying adherent-use HR 0.26 (0.09–0.77). | ABOVE — Conditional. ≤36h subgroup is the informative finding; replicates timing signal from Suess. ITT is failure-mode evidence. Weight: Moderate. |
| MacIntyre 2009 Sydney, Australia | 3-arm cluster RCT 145 HH / 290 adults Symptom-triggered PCR | Broad respiratory viruses (incl. influenza) | ITT null. Adherence dose-response: fully adherent (5d) RR 0.16; >3d RR 0.42; ≤2d null. | ABOVE — Conditional. Unique dose-response gradient with adherence within an RCT. ITT is failure-mode evidence. Weight: Moderate. |
| Wang 2020 Beijing, China | Retrospective household cohort 124 families / 335 individuals Lab-confirmed | SARS-CoV-2 (early pandemic) | Pre-onset masking: aOR 0.21 (0.06–0.79). Post-onset masking: null in multivariable analysis. | ABOVE — Conditional. Directional signal robust; magnitude untrustworthy (recall bias, small events). Weight: Moderate (downward qualification). |
| Larson 2010 New York, USA | 3-arm household RCT 509 HH / 2,788 members PCR + symptom capture | Influenza + URI Two seasons | Primary incidence: null. Secondary attack rate (combined): OR 0.82 (0.70–0.97). | ABOVE — SAR finding only; cannot isolate mask from hand sanitiser. Weight: Moderate (SAR) / Low (primary). |
| **BELOW THE LINE — Failure-mode evidence (null result mechanistically expected; does not disconfirm mask efficacy)** | | | | |
| Canini 2010 France | Cluster RCT (source control) 105 HH / 306 contacts Stopped at 28% of target | Influenza H3N2 | ITT null: aOR 0.95 (0.44–2.05). CI spans 56% reduction to trivial harm — entirely uninformative. | BELOW — Failure-mode. Premature termination + underpowering + symptom-only outcomes. Does not disconfirm mask mechanism. |
| MacIntyre 2016 Beijing, China | Cluster RCT (source control) 245 index cases / 597 contacts | Influenza (pandemic + seasonal) | ITT null (all outcomes NS). Post-hoc actual-use HR 0.22 (0.06–0.86) — unrandomised. | BELOW — Failure-mode. Event rate ~10-fold below assumption; 35% control contamination. Post-hoc finding hypothesis-generating only. |
| Cowling 2008 Hong Kong | 3-arm cluster RCT pilot 122 HH / 350 contacts RT-PCR | Influenza A & B | All outcomes null; adjusted ORs ~1.1 with very wide CIs. | BELOW — Failure-mode. Explicitly underpowered pilot; >25% control contamination. Provides calibration data for Cowling 2009. |
| **BELOW THE LINE — Cautionary tale** | | | | |
| Simmerman 2011 Bangkok, Thailand (Cautionary tale) | 3-arm household RCT 348 HH / 885 members RT-PCR + serology | Influenza A & B + H1N1 | ILI outcome: apparent harm (OR ~2.1) — surveillance sensitisation artefact. PCR/serology: null (OR 1.16, NS). | BELOW — Cautionary tale. Co-sleeping with high-shedding index case creates nocturnal exposure window no daytime protocol can compensate for. ILI 'harm' is detection bias. Weight: None for efficacy inference. |

### Table S2. Community randomised controlled trials (Group 2; n = 7)

*Above the line = contributes to causal inference on mask efficacy. Below the line = null result mechanistically expected. Rejected studies in Table S7.*

| **Study** | **Design & N** | **Pathogen / context** | **Key finding** | **Verdict** |
| --- | --- | --- | --- | --- |
| **ABOVE THE LINE — Contribute to causal inference on mask efficacy** | | | | |
| Abaluck 2022 Bangladesh (rural) | Village cluster RCT 572 villages / ~342k adults ~800k direct observations + serology | SARS-CoV-2 (Alpha) | Symptomatic seroprevalence: adjusted PR 0.91 (0.82–1.00). Surgical: PR 0.89; cloth: PR 0.94 (NS). Adults ≥60y surgical: PR 0.65 (0.45–0.85). WHO symptoms all masks: PR 0.88 (0.83–0.93). | ABOVE — Highest weight in group. Only study with verified, large behavioural contrast (mask use tripled 13%→42%). ~65% of compliance gain from intensive in-person promotion. Anchor study for community-level estimates. Weight: High. |
| Aiello 2012 USA | 3-arm campus cluster RCT 37 clusters / n=1,111 PCR subset | Influenza A/B + seasonal ILI | FM+HH vs Control cumulative ILI: RR 0.78 (NS); week 6 RR 0.25 (0.07–0.87). FM-only vs Control: RR 1.10 (NS). | ABOVE — Conditional. Signal confined to bundled arm and late epidemic weeks; cannot isolate mask from hand hygiene. Weight: Moderate (bundled) / Low (mask-specific). |
| Solberg 2024 Norway | Individual RCT n=4,647 Surgical masks in public spaces 14 days | SARS-CoV-2 + influenza + other respiratory viruses | Self-reported symptoms (primary): OR 0.71 (0.58–0.87), ARD −3.2%. Objective COVID-19 outcomes: NS (69 registered tests — severely underpowered). | ABOVE — Conditional. Self-reported outcome subject to unblinding bias; controls attended more high-exposure settings. Source control not tested. Weight: Moderate. |
| **BELOW THE LINE — Failure-mode evidence (null result mechanistically expected; does not disconfirm mask efficacy)** | | | | |
| Bundgaard 2021 Denmark (DANMASK-19) | Individual RCT n=4,862 Surgical masks + instructions 30-day follow-up | SARS-CoV-2 (first wave) | Primary composite: OR 0.82 (0.54–1.23), p=0.33. All estimates directionally protective but statistically inconclusive. | BELOW — Failure-mode, cautionary tale. Tests mask recommendation, not wearing; ~half non-adherent; all contacts unmasked. Powered for 50% reduction — unable to detect plausible 15–25% effect. CI compatible with substantial benefit. |
| Mallinson 2025 India | Village cluster RCT 20 villages / ~32k adults 3-layer cotton masks + promotion | SARS-CoV-2 (first wave) | Primary (notified COVID-19): RR 0.96 (0.57–1.63). Hospitalisation: RR 0.36 (0.12–1.05) — 5 vs 13 events. All secondary outcomes directionally protective but uninformative. | BELOW — Failure-mode. Observed event rate ~1% vs 15% assumed (15-fold shortfall; ~5% power). Mask use peaked at 19% vs 38% any face covering in controls. |
| Aiello 2010 USA | 3-arm campus cluster RCT 7 units (3 analytical) / n=1,297 PCR confirmed | Influenza A/B + seasonal ILI | Cumulative ILI: FM+HH RR 0.87 (NS); FM RR 0.90 (NS). Weeks 4–6: FM+HH RR 0.65 (0.47–0.91) — coincides with epidemic decline. | BELOW — Failure-mode. Only 3 analytical cluster units; severe sex imbalance; 10 PCR-confirmed influenza events. Late-week signal confounded. Cannot support causal inference. |
| Nanque 2024 Guinea-Bissau | Village cluster RCT; 181 clusters / 39,574 enrolled; 2-layer cloth masks + messaging vs messaging only | COVID-19 | Primary outcome null: OR 0.81 (0.57–1.15). Observed mask use differed by only 3% between arms; only 3.1% wore the study mask. Self-reported versus observed use (92% vs 40%) documented substantial adherence misclassification. | BELOW – Failure-mode, cautionary tale. Mechanism not activated. Minimal behavioural contrast and low-filtration intervention masks made the null result structurally expected. Principal contribution is documenting adherence misclassification. |

### Table S3. Outbreak investigations (Group 3; n = 9)

*Above the line = contributes to causal inference on mask efficacy. Below the line = dominant confounds prevent causal inference or design-disqualified. Rejected studies in Table S7.*

| **Study** | **Design & N** | **Pathogen / context** | **Key finding** | **Verdict** |
| --- | --- | --- | --- | --- |
| **ABOVE THE LINE — Contribute to causal inference on mask efficacy** | | | | |
| Nelson 2021 Massachusetts, USA | School contact-tracing cohort 435 index cases / 1,771 contacts 8 districts; 75% tested | SARS-CoV-2 (pre-Delta) | Both-masked vs both-unmasked: SAR 1.7% vs 11.7%; RR 6.98 (3.09–15.77). Lunch exposure RR 5.74 (2.11–15.63). Bus exposures: 0/38 infected. | ABOVE — Conditional. Mask removal at lunch is the operative mechanism signal; setting and masking are inseparable. 29 total transmissions. Weight: Low-to-Moderate. |
| Hast 2022 Georgia, USA | Analytic outbreak investigation 796 survey / 628 tested 12 schools; RT-PCR; unmasked sports exemption | SARS-CoV-2 (pre-vaccine) | Sports participation: OR 3.5–6.4. Unmasked time during sports: OR 4.3–9.0. Always-masked sports participants: 0/11 infected vs 15/74 unmasked (0% vs 20.3%). | ABOVE — Conditional. Policy exemption during high-intensity indoor activity = contextual failure mode. Zero events in 11 masked sports participants directionally informative but statistically fragile. Weight: Low-to-Moderate. |
| Zhang 2013 Trans-Pacific flight | Outbreak investigation embedded case-control 9 cases / 32 controls 20-hour flight; PCR-confirmed | Influenza H1N1pdm09 | 0/9 cases wore a mask for the full flight vs 15/32 (47%) controls. OR 0 (95% CI 0–0.71), p=0.018. | ABOVE — Conditional. Unique enclosed-air prolonged-exposure setting. OR rests on zero-cell count (n=9 cases). Proximity confounding unresolvable. Direction informative; magnitude unreliable. Weight: Low-to-Moderate. |
| Sugimura 2021 Hiroshima, Japan | Contact-tracing cohort (retrospective) 820 contacts Universal PCR | SARS-CoV-2 (early pandemic) | Adjusted RR 0.6 (0.3–0.9). Significant in workplace and cluster settings. Null in household, meal, and drinking contacts (mask use 4–16%). | ABOVE — Below-line qualified. Context-specific stratification is primary contribution; null in meal/household settings strengthens failure-mode account. Dominant confound: behavioural clustering. Weight: Moderate-Low. |
| Riley 2022 Iowa, USA | Prospective contact-tracing cohort 966 contacts Encounter-level mask data | SARS-CoV-2 (pre-Delta, pre-vaccine) | SAR both-masked 12.5% vs ≥1 unmasked 25.6%. Multivariable OR 0.70 (0.57–0.84) per mask score unit. Exposure >2h: OR 1.92 (1.35–2.76). | ABOVE — Conditional. Duration–masking interaction is the primary mechanistic contribution. Behavioural clustering is dominant unmeasured confounder. Weight: Moderate. |
| **BELOW THE LINE — Failure-mode evidence (null result mechanistically expected; does not disconfirm mask efficacy)** | | | | |
| Hong 2020 China | Retrospective outbreak investigation 41 sources / 197 contacts No adjusted analysis, no CIs | SARS-CoV-2 (early pandemic) | Attack rate 8.1% (masked sources) vs 19.0% (unmasked sources), p<0.001. No CIs. 21/24 local infections traced to one card-playing cluster. | BELOW — No adjustment; single cluster dominates unmasked arm. Direction consistent with source control but quantitative inference impossible. Weight: Low. |
| Pauser 2021 Germany | Single-event outbreak investigation Indoor basketball match ~55 tested; 65% overall attack rate | SARS-CoV-2 | Any mask vs no mask: 46% vs 83% infected. Community/surgical masks: 50–60% attack rates across all zones. FFP2/KN95 continuous: 0/4 infected. | BELOW — Cautionary. Surgical/community masks insufficient at extreme aerosol loading (heavy indoor exercise). FFP2 finding hypothesis-generating (n=4). Role confounding extreme and unresolvable. Weight: Low. |
| Payne 2020 USS Theodore Roosevelt | Cross-sectional outbreak investigation n=382 (27% of eligible) Single timepoint | SARS-CoV-2 | Face covering OR 0.30 (0.17–0.52). Shared sleeping berth with case: OR 3.3 (1.8–6.1). Overall infection prevalence 62%. | BELOW — Cross-sectional; temporal ordering impossible; reverse causation cannot be excluded; co-protective behaviours uncontrolled; dominant transmission route (sleeping berth) incompatible with mask use. Weight: Low. |
| Rebmann 2021 Missouri, USA | Retrospective contact-tracing cohort 378 contacts University setting RT-PCR | SARS-CoV-2 (pre-Delta, pre-vaccine) | Masked-only: 7.7% (2/26) infected. Any unmasked: 32.4% (114/352). aOR 4.9 (1.4–31.1). Dose-response: aOR 1.4 (1.2–1.6) per additional exposure incident. | BELOW — Setting type is dominant competing explanation (institutional vs social settings); n=26 in masked group (2 events); CI 1.4–31.1 too wide for inference. Weight: Low. |

### Table S4. Case-control studies (Group 4; n = 6)

*Above the line = contributes to causal inference on mask efficacy. Below the line = structural limits prevent testing the primary question. Rejected studies in Table S7.*

| **Study** | **Design & N** | **Pathogen / context** | **Key finding** | **Verdict** |
| --- | --- | --- | --- | --- |
| **ABOVE THE LINE — Contribute to causal inference on mask efficacy** | | | | |
| Tjaden/Edelstein 2023 North Carolina, USA | Nested case-control 359 cases / 3,544 controls Prospective daily mask survey 10-day pre-symptom window | SARS-CoV-2 (pre-Delta through Delta) | Not consistently masking: aOR 1.49 (1.14–1.95). Serology sensitivity analysis: aOR 1.86 (1.29–2.70). Vaccine × mask gradient: vaccinated+masked (ref); vaccinated+unmasked aOR 1.62; unvaccinated+masked aOR 5.94; unvaccinated+unmasked aOR 9.07. | ABOVE — Conditional. Prospective daily exposure measurement is key strength. Layered vaccine × mask gradient is primary mechanistic contribution. Net bias likely toward null. Weight: Moderate. |
| Tjaden/Gibbs 2023 North Carolina, USA | Nested case-control 3,901 cases / 27,813 controls Stratified by variant period | SARS-CoV-2 (pre-Delta, Delta, Omicron) | Pre-Delta aOR 1.66 (1.43–1.91); Delta aOR 1.53 (1.23–1.89); Omicron aOR 1.16 (1.03–1.32); P-interaction <0.001. All periods statistically significant. | ABOVE — Conditional. Variant-period attenuation is unique mechanistic contribution: higher transmissibility reduces marginal protective effect. Mask protection persisted even in Omicron. Weight: Moderate. |
| Andrejko 2022 California, USA | Test-negative design case-control 652 cases / 1,176 controls Mask type sub-cohort n=534 | SARS-CoV-2 (Feb–Dec 2021) | Always vs never: aOR 0.44 (0.24–0.82). Mask-type gradient: N95/KN95 aOR 0.17 (0.05–0.64); surgical aOR 0.34 (0.13–0.90); cloth aOR 0.44 (0.17–1.17, NS). | ABOVE — Conditional. Best-designed case-control (TND, PCR outcome, frequency-response and type gradients). Co-behavioural confounding limits causal attribution. Weight: Moderate. |
| Doung-Ngern 2020 Thailand | Retrospective case-control 211 cases / 839 controls 3 cluster settings Multilevel logistic regression | SARS-CoV-2 (early pandemic) | Always mask: aOR 0.23 (0.09–0.60). Sometimes mask: aOR 0.87 (0.41–1.84, NS). Setting SAR range: boxing stadiums 86%; workplaces 4.9%. | ABOVE — Conditional. Consistency threshold is primary mechanistic contribution: intermittent use provides no detectable protection. Deep behavioural confounding. Weight: Moderate. |
| Wu 2004 Beijing, China | Matched case-control 94 cases / 281 controls 2-week pre-symptom exposure window | SARS-CoV-1 (2003 epidemic) | Always vs never: aOR 0.3 (0.1–0.6). Sometimes vs never: aOR 0.4 (0.2–0.9). Visiting fever clinic: OR 12.7 (3.1–52.0). | ABOVE — Below-line qualified. Dose-response gradient informative; near-fatal outcome misclassification (only 26% seropositive) prevents reliable SARS-specific inference. Weight: Low. |
| **BELOW THE LINE — Failure-mode evidence (null result mechanistically expected; does not disconfirm mask efficacy)** | | | | |
| Lau 2004 Hong Kong | Mixed attack-rate analysis + case-control 881 SARS-affected households 131 secondary cases / 2,139 controls | SARS-CoV-1 (2003 epidemic) | Hospital visit, both unmasked vs no visit: OR 3.12 (1.65–5.91). Both masked vs no visit: OR 1.77 (NS). Household SAR: 8.0% of members, 14.9% of households. | BELOW — Structural scope failure. Mask variable confined to hospital visits — household mask use (primary transmission pathway) entirely unmeasured. Strong on transmission dynamics; weak on mask mechanism. Weight: Low. |

### Table S5. Prospective cohort studies (Group 5; n = 2)

*Above the line = contributes to causal inference on mask efficacy. Below the line = structural limits prevent testing the primary question. Rejected studies in Table S7.*

| **Study** | **Design & N** | **Pathogen / context** | **Key finding** | **Verdict** |
| --- | --- | --- | --- | --- |
| **ABOVE THE LINE — Contribute to causal inference on mask efficacy** | | | | |
| Kwon 2021 United States | Prospective app-based cohort 134,597 in mask analysis Weekly self-report from June 2020 | SARS-CoV-2 (Mar–Jul 2020) | Always vs never mask: adjusted HR 0.36 (0.30–0.44) predicted COVID-19; HR 0.37 (0.24–0.57) PCR-confirmed. 'Sometimes' paradoxically lower than 'always' — signals residual confounding. | ABOVE — Conditional. Prospective weekly measurement is a design strength. HR 0.36 almost certainly inflated by unmeasured behavioural confounding. Direction consistent; magnitude untrustworthy. Weight: Low-to-Moderate. |
| **BELOW THE LINE — Failure-mode evidence (null result mechanistically expected; does not disconfirm mask efficacy)** | | | | |
| Baumkötter 2022 Germany (Cautionary tale) | Population-based prospective cohort n=9,678 (mask analysis) Multimodal outcome (PCR + dual serology + self-report) | SARS-CoV-2 (Oct 2020–Jun 2021) | Mask use: unadjusted PR 0.73 (0.55–0.96); adjusted PR 0.96 (0.68–1.36) — null. Physical distancing: adjusted PR 0.77 (0.62–0.96), significant. | BELOW — Exposure ceiling failure. 91.5% of participants near-universally adherent — no meaningful unmasked comparator. Adjusted null structurally inevitable. Distancing significant in same study (48% vs 52% distribution). Mask result does not disconfirm efficacy. |

### Empty table: Cross-sectional and seroprevalence studies (Group 6; n = 0)

All 11 cross-sectional and seroprevalence studies in this group are rejected as non-contributory to causal inference on mask efficacy. Cross-sectional designs cannot establish whether mask-wearing preceded infection or infection preceded mask-wearing — a structural impossibility of causal inference that is independent of sample size or statistical sophistication. Three studies that have been cited in public debate (Elgersma 2023, Baig 2021, Xu 2020) are discussed as cautionary tales in the main text illustrating test-seeking collider bias, occupational confounding, and statistical noise respectively. All 11 rejected studies are detailed in Table S7. Additional cross-sectional studies will be reviewed with mask mandate effectiveness study.

### Table S6. Hajj pilgrimage studies (Group 7; n = 4)

*All studies rely on symptom-based outcomes; none supports pathogen-specific causal inference or reliable quantitative effect estimates. Above the line = contributes mechanistic insights despite major limitations. Cautionary = null result explained by mechanism failure, not device failure. Rejected studies in Table S7.*

| **Study** | **Design & N** | **Pathogen / context** | **Key finding** | **Verdict** |
| --- | --- | --- | --- | --- |
| **ABOVE THE LINE — Contribute to causal inference on mask efficacy** | | | | |
| Barasheed 2014 Saudi Arabia Hajj 2011 | Pilot cluster RCT 22 tents / 164 participants 5-day Hajj window | ILI (rhinovirus dominant) | ILI: mask arm 31% vs control 53%, p=0.04. Duration dose-response within mask arm: >8h/day 2.9% vs 5–8h/day 14.3%, p=0.01. | ABOVE — Below-line qualified. Duration dose-response is the key mechanistic contribution for the Hajj literature. Pilot design, demographic imbalances, no ICC adjustment. Weight: Low. |
| Choudhry 2006 Saudi Arabia Hajj 2002 | Prospective cohort n=1,027 Post-Hajj telephone follow-up Unadjusted | Syndromic ARI (unconfirmed) | Males — dose-response: most-of-time 13.5% / sometimes 32.7% / never 76.5%; RR never vs most-of-time 5.67 (4.26–7.55). Females — facemask: RR 1.08 (NS); facecover (niqab): RR 1.23 (NS). | ABOVE — Below-line qualified. Dose-response in men and mechanistically informative female null (face coverings removed in same-sex tents). Unadjusted; RR 5.67 substantially inflated. Weight: Low. |
| **BELOW THE LINE — Cautionary tale** | | | | |
| Alfelali 2020 Saudi Arabia Hajj 2013–2015 (Cautionary tale) | Open-label cluster RCT 318 tents / 6,338 ITT 3M surgical mask Three Hajj seasons | Multiple respiratory viruses | Daily adherence: 24.7% mask vs 14.3% control (~10pp contrast). ITT lab-confirmed RTI: OR 1.4 (0.9–2.1, NS). ITT clinical RTI: OR 1.1 (0.9–1.4, NS). | BELOW — Cautionary tale. Adherence collapse + control contamination + nocturnal exposure bypass + event rate failure = structurally incapable of testing mechanism. OR 1.4 should not be cited as evidence of mask harm. |
| **BELOW THE LINE — Failure-mode evidence (null result mechanistically expected; does not disconfirm mask efficacy)** | | | | |
| Al-Jasser 2012 Saudi Arabia Hajj 2009 | Prospective cohort (cross-sectional measurement) n=1,507 Single post-Hajj telephone interview Unadjusted | Syndromic URTI (unconfirmed) | Most-of-time vs never: RR 1.21 (1.03–1.43), p=0.014. Niqab/facecover comparisons: all NS (RR 0.98–1.22). | BELOW — Failure-mode. Cross-sectional measurement structure; unadjusted; syndromic-only outcome. Niqab null mechanistically informative: non-filtering face cover provides no protection. Weight: Low. |

# Rejected Studies (Table S7; n=29)

Studies in this table were excluded as non-contributory to causal inference on mask efficacy and also non-contributory to mechanistic understanding. Rejection criteria fall into four categories: (1) exposure too crude or temporally unanchored to test the mechanism; (2) outcome misclassification severe enough to prevent inference; (3) comparison group too small or structurally invalid; (4) design incapable of testing the primary causal question. Rejected studies are not evidence that masks do not work — they are evidence that these particular studies cannot answer the question.

| **Study** | **Design & setting** | **Why rejected** |
| --- | --- | --- |
| **GROUP 1: Household transmission studies (2 rejected)** | | |
| Vurunbigi 2026 Turkey 2020–2023 | Ambispective (retrospective and prospective) household cohort 119 HH / 501 individuals SAR 40.7% | Binary household-level mask variable (yes/no); type, fit, timing, consistency unmeasured. Primary outcome null: aOR 0.63 (0.27–1.44). Secondary finding (complete household infection aOR 0.34) rests on ~7 events. Multiple unadjusted confounders. Physical mechanism unverifiable. |
| Wright 2022 Queensland, Australia 2021 (Delta) | Retrospective household case series 17 HH / 72 persons SAR 29.6% | Masking data for only 11/17 households. Self-reported, retrospective, no type/fit/consistency data. No formal adjustment. Selection bias: 6/17 households did not participate in interviews. Dwelling size was the only independent transmission predictor. |
| **GROUP 3: Outbreak investigations (2 rejected)** | | |
| Peck 2004 Pennsylvania, USA SARS 2003 | Single-case outbreak investigation 41 contacts 0 secondary cases | Zero secondary cases including 17 fully unmasked pre-diagnosis HCW contacts. Dominant competing explanation: low source infectivity (PCR-negative from day 11; all viral cultures negative). Mask use informal, self-initiated, began day 6 after peak-infectivity exposures had occurred. No effect estimate calculable. |
| Tuan 2007 Vietnam SARS 2003 | Retrospective contact cohort 212 eligible; 180 serology SAR 4.2% 9 mask users, 0 events | 95% of contacts never wore a mask — no meaningful contrast. OR = 0 (95% CI 0–15.37): zero-cell artefact, entirely uninformative. Mask use entirely uncharacterised. Primary contribution: caregiving contact (OR 5.78, 1.23–24.24) as dominant SARS transmission pathway. |
| **GROUP 4: Case-control studies (6 rejected)** | | |
| Gonçalves 2020 Brazil 2020 | Population-based case-control Serologically confirmed SARS-CoV-2 Community sample | Mask data sparse and unreliable: single survey wave, no timing or type data, tiny non-masker reference group. Cases and controls interviewed at different epidemic moments — severe temporal mismatch prevents causal inference. |
| Alsaïdi 2021 France Homeless shelter 2020–21 | Case-control PCR-confirmed and clinically suspected cases vs controls in shelter | Mask not in final multivariable model — no adjusted estimate reported. Heterogeneous case definition (mostly clinical, not lab-confirmed). Temporal ambiguity: mask exposure measured post-infection for many. Shelter crowding dominates but inadequately controlled. |
| Hobbs 2020 USA 2020 | Test-negative case-control 154 PCR-positive and 243 PCR-negative children ≥2 years School/daycare | Consistent masking aOR 0.4 (0.2–0.8) directionally consistent but mask use recalled ~1 month post-test. Dominant exposure predictor was close contact with known case (aOR 3.2). School clustering unadjusted. Insufficient for reliable causal inference. |
| Lio 2021 Macao 2021 | Case-control 24 COVID-19-positive travellers hospitalised vs 1,113 quarantine-completers | Cases and controls from structurally incomparable populations. Geopolitical confounding (transmission risk varies across visited countries, unadjusted). Mask exposure unanchored to specific contexts. Structural incomparability prevents any causal inference. |
| Speaker 2021 USA 2021 | Unmatched case-control survey COVID-positive vs age-sex matched PCR-negative controls Behaviours in 7-day window prior to testing | Behaviours recalled after people knew their test results — reverse causation dominant. 9% response rate. Fundamentally different exposure opportunities: 40% of cases had known COVID contact vs <1% of controls. No multivariable modelling. |
| Thomas 2022 South Wales, UK December 2020 | Unmatched case-control nested in mass asymptomatic LFT-testing pilot | Authors excluded mask variables from final multivariable models. Mask behaviour self-reported after result known — reverse causation dominant. Cases and controls structurally incomparable in exposure opportunities. |
| **GROUP 5: Prospective cohort studies (1 rejected)** | | |
| Pham 2024 California, USA Jan–Dec 2022 (Omicron) | Prospective cohort n=1,230. 91 infected / 1,139 not infected. PCR-confirmed via HER. 98.7% vaccinated | Fatal temporal misalignment: baseline mask behaviour (2-week recall at enrolment) used to predict infection across 90-day window during which masking declined universally. Post-infection finding is the primary causal signal: infected group had 2.43× greater odds of increasing mask use subsequently (OR 2.43, 1.24–4.74) — demonstrating infection drives masking, not the reverse. |
| **GROUP 6: Cross-sectional and seroprevalence studies (11 rejected — all studies in this group)** | | |
| Abolnezhadian 2022 Iran 2020–21 | Case-control hybrid n=1,256 Retrospective self-report | Mask dropped from multivariable model (OR 1.28, 0.95–1.73, NS). Non-comparable source populations. Binary unanchored exposure. Temporal ordering absent. |
| Baig 2021 Pakistan 2020 | Community seroprevalence n=6,333 Age-stratified | No OR or CI for mask finding. Counter-intuitive raw data (higher seroprevalence in regular mask users) consistent with occupational confounding. Data provenance concerns (100% blood draw rate implausible). Temporally unanchored. |
| Clipman 2021 Vermont, USA Apr–Jun 2020 | Community survey + serology n=1,030 55 events | 55 total events; primary mask finding NS (OR 0.63, 0.36–1.09). Post-hoc 'recent indoor use' OR 0.21 (0.06–0.76) — sensitivity analysis only, small n. Cumulative seropositivity not temporal. |
| Da Silva Torres 2022 Brazil Two cross-sections 2020–21 | Repeated cross-section n=1,337 (waves 1+2) Convenience sample | Two independent samples — not the same people followed. Waves differ by variant, vaccination, epidemic phase. Temporal ambiguity unresolved. OR 3.38 conflates period and behaviour. 89–83% 'always' masking — extreme ceiling. |
| Elgersma 2023 Norway Feb–Apr 2022 (Omicron) [Bias case study] | Cross-sectional secondary analysis of RCT dataset n=3,209 Omicron wave | Apparent harm signal (aRR 1.33–1.40) almost entirely explained by test-seeking collider bias: 54% of non-maskers reported no testing vs 32–35% of mask users. Registry-PCR outcome (more valid): aRR 0.94–0.99 (null). Time-adjusted: aRR 1.03–1.04 (near-null). Retained as methodological teaching case illustrating how collider bias generates spurious harm signals in cross-sectional designs. |
| Nagata 2025 Japan Apr 2021–Aug 2022 | Cross-sectional PCR surveillance n=1,125,188 Multi-wave (waves 4–7) | Composite bundled exposure (mask + handwashing inseparable). Near-universal masking across all waves — minimal contrast. Cannot isolate mask-specific effect. |
| Shaweno 2021 Ethiopia 2020 | Community seroprevalence n=684 ~22 seropositive events Rural setting | ~22 seropositive events. AOR 6.37 (2.30–17.66) implausibly large — almost certainly confounded by exposure intensity (employed commuters vs jobless: AOR 9.73). Extreme instability from small event count. |
| Theuring 2021 Germany Nov 2020 | School seroprevalence n=1,119 students + staff + household contacts | OR 11.38 (2.28–59.64) rests on 5 events in 30 non-masking students — extreme cell sparsity. Unadjusted. Self-report, temporally unanchored. |
| Uchida 2014 Japan 2014–15 influenza season | School census n=10,524 All elementary schools End-of-season questionnaire | Retrospective guardian-report at epidemic end — simultaneous outcome/exposure measurement. OR 0.859 (0.778–0.949) plausible but reverse causation structurally unresolvable. Census-based and adequately powered but design incapable of temporal causal inference. |
| Van den Broek-Altenburg 2021 Vermont, USA 2020 | Survey + serology n=454 tested 10 seropositive events | 10 seropositive events — completely underpowered. No significant mask–seropositivity association (p=0.26). Mask→adult contacts: IRR ~2.15 — more contacts among mask wearers, potentially risk-compensatory. |
| Xu H 2020 China Jan–Mar 2020 | Online cross-sectional survey n=8,158 (snowball sample) 57 diagnosed cases | 97.9% of outdoor-goers masked — only 108 non-wearers (8 events), generating RR 12.38 (5.81–26.36) that is statistical noise. Non-maskers during compulsory lockdown are a tiny atypical minority. Self-reported diagnosis (not PCR-confirmed). |
| **GROUP 7: Hajj pilgrimage studies (7 rejected)** | | |
| Alabdeen 2005 Saudi Arabia Hajj 2002–2004 | Quasi-experimental (claimed RCT) Pilgrims Syndromic ARI | No usable randomisation detail. ARI analysis compares self-reported compliers vs non-compliers within the mask arm — equivalent to an uncontrolled observational study. No ITT analysis. Compliance confounding severe. |
| Balaban 2012 Hajj 2009 US pilgrims | Cross-sectional survey (post-travel) n=246 40 ILI events Self-reported ILI and mask use | Functionally cross-sectional: all mask use data collected retrospectively in post-travel survey alongside illness outcomes. Reverse causation and recall bias dominant. No formal adjusted analysis. |
| Deris 2010 Malaysia Hajj 2007 | Cross-sectional survey n=873 Self-reported URTI and mask use | Reverse causation dominant: OR 1.89 (1.30–2.76) for mask use almost certainly explained by pilgrims developing symptoms adopting masks reactively. Cross-sectional design cannot establish temporal ordering. |
| Emamian 2013 Saudi Arabia Hajj 2010 | Nested case-control Syndromic ARI Iranian pilgrims | Exposure definition catastrophically weak: 'used a mask at least once during Hajj' — near-universal nominal compliance eliminates any meaningful contrast. Cross-sectional timing. No type, fit, or frequency data. |
| Gautret 2011 France Hajj 2009 | Prospective cohort n=129 PCR for ILI subset Self-reported mask use | No statistically significant mask association for any outcome. N=129, very small. Mask data incidental to study purpose (characterising ILI incidence and pathogen spectrum). Not designed to test mask efficacy. |
| Gautret 2015 France Hajj 2012 | Prospective descriptive cohort n=170 ILI + PCR Self-reported mask use | Entirely descriptive study — no formal mask efficacy analysis conducted or reported. Mask wearing rates described but no comparison of ILI rates by mask use. Not designed to test mask efficacy. |
| Hashim 2016 Malaysia Hajj 2013 | Cross-sectional survey n=1,044 Self-reported URTI and mask use | 93.4% reported mask use — exposure ceiling eliminates meaningful contrast. Mask category includes towels, veils, and scarves not separately analysed from purpose-made masks — exposure variable fatally heterogeneous. Cross-sectional timing. |
